# Supplementary material
Source: PubMed Central journal article supplement (PMC7164865)
Supplement: mmc2.pdf [file mmc2.pdf]

# THE LANCET

## Gastroenterology & Hepatology

### Supplementary appendix

Supplement to: An P, Ji M, Ren H, et al. Prevention of COVID-19 in patients with inflammatory bowel disease in Wuhan, China. *Lancet Gastroenterol Hepatol* 2020; 5: 525-27.

This translation in Chinese was submitted by the authors and we reproduce it as supplied. It has not been peer reviewed. *The Lancet's* editorial processes have only been applied to the original in English, which should serve as reference for this manuscript.

此简体中文译文由作者提交，我方按照提供的版本刊登。此译文并未经过同行审阅。医学期刊《柳叶刀》的编辑流程仅适用于英文原稿，英文原稿应作为此手稿的参考。

## 中国武汉炎症性肠病患者对新型冠状病毒的预防

Ren Mao等在《柳叶刀胃肠病学和肝病杂志》发表评论中指出<sup>1</sup>，炎症性肠病 (inflammatory bowel disease, IBD) 患者的机会性感染风险较一般人群增加。因此在此次新型冠状病毒 (COVID-19) 的大流行期间需特别关注此类患者人群。

本团队对于2000年1月1日至2019年12月8日期间，在武汉大学人民医院（中国炎症性肠病区域医学中心）注册登记的318例IBD患者（克罗恩病患者114例，溃疡性结肠炎患者204例）进行了回顾性分析。总结分析了患者的临床特征及其在武汉新型冠状病毒暴发流行时的地理特点（见附录第2-4页）。患者年龄中位数为39.2岁（IQR范围15-79岁），其中超过60岁的患者33例（10%）。49位（15%）患者（其中克罗恩病患者22例，溃疡性结肠炎患者27例）有慢性基础疾病（见附录第2、3页），35例（31%）克罗恩病患者和93例（46%）溃疡性结肠炎患者处于IBD活动期。超过三分之二的患者（246例[77%]）工作或生活在新型冠状病毒疫情暴发的可疑地点华南海鲜市场附近（≤30 km）。我们记录并分析了患者收到本团队警报和相关信息的时间与频次、自我预防措施以及在2019年12月8日到3月30日之间确诊或疑似新型冠状病毒感染的情况。

自1月3日至3月30日，5位IBD患者在疫情期间因病情加重住院治疗。其中1位克罗恩病患者因肠穿孔接受急诊外科手术，1位克罗恩病孕妇提前分娩（见附录第2、3页）。疫情暴发前，接受类固醇激素治疗的患者共40例（13%），免疫抑制剂（硫唑嘌呤）治疗患者35例（11%），沙利度胺治疗患者37例（12%），使用生物制剂英夫利昔单抗治疗的患者20例（6%）。有12位患者加入药物临床试验（见附录第2、3页）。自1月31日至3月30

日，20位患者因病情发作需调整治疗，其中包括类固醇激素治疗（n = 18）和克罗恩病患者全肠内营养（n = 15），治疗调整时间中位数为1.3天（IQR 1.0-2.3天）。

2020年1月3日，我们根据中华胃肠病学会指南暂停武汉地区患者的英夫利昔单抗输注和免疫抑制剂治疗<sup>2</sup>，并根据患者病情调整为5-氨基水杨酸（37例）和/或沙利度胺（43例，二者同时使用者25例）治疗。自1月3日起，本团队通过微信向所有IBD患者发送新型冠状病毒相关内容的患者教育、指导信息与警报，所有患者均予以回复和反馈（如表所示）。大部分患者在3天之内开始采取防护措施：保持良好手卫生，网上就诊，注意发热及呼吸道症状。所有患者均关注了本团队发送的自我防护信息，并及时了解和关注新型冠状病毒的相关官方新闻（如表所示）。大部分患者减少了外出时间，外出时戴

口罩，并做好口罩储备，并对本团队的举措表示非常满意（如表所示）。

2020年1月8日，我院呼吸科出现首例新型冠状病毒确诊病例，2020年1月12日，我消化内科出现新型冠状病毒确诊患者（见附录p 5）。1月13日本团队对相关警报和管理模式采取升级，包括对所有IBD住院患者进行单间隔离，且每日向所有IBD患者发送警报，建议减少外出，对近期使用过生物制剂和免疫抑制剂治疗的患者则建议使用N95口罩，并与本IBD团队保持联系。而对于健康认知和教育程度较低的患者，则采取电话方式保持联系。此外，对于加入药物临床试验且远离本中心的患者，我们则以邮寄的方式保证患者用药，以避免其在医院的暴露风险。至2020年1月13日，本中心大部分IBD患者已出院，IBD门诊关闭，并实行网上常规与非急诊就诊模式。我们还积极参与了在新型冠状病毒流行

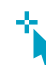

Lancet Gastroenterol Hepatol  
2020

Published Online  
April 17, 2020  
[https://doi.org/10.1016/S2468-1253\(20\)30121-7](https://doi.org/10.1016/S2468-1253(20)30121-7)  
See Online for appendix

|                                                                     | 警报<br>1月3日<br>(n=318) | 升级警报<br>1月13日<br>(n=318) |
|---------------------------------------------------------------------|-----------------------|--------------------------|
| 反应时间 (天; 中位数[IQR])                                                  | 1.8 (1.0-3.4)         | 1.2 (1.0-2.3)            |
| 患者回应人数                                                              | 318 (100%)            | 318 (100%)               |
| 满意度                                                                 |                       |                          |
| 非常满意                                                                | 300 (94%)             | 318 (100%)               |
| 满意                                                                  | 18 (6%)               | 0                        |
| 不满意                                                                 | 0                     | 0                        |
| 减少外出时间*                                                             | 291 (92%)             | 318 (100%)               |
| 参加各种社会聚会                                                            | 0                     | 0                        |
| 外出时戴口罩                                                              | 284 (89%)             | 318 (100%)               |
| 购买口罩储备                                                              | 246 (77%)             | 318 (100%)               |
| 保持手卫生†                                                              | 296 (93%)             | 318 (100%)               |
| 就诊方式                                                                |                       |                          |
| 网上咨询、就医及购药                                                          | 289 (91%)             | 318 (100%)               |
| 至医院门诊就医                                                             | 27 (8%)               | 0                        |
| 不就医                                                                 | 2 (1%)                | 0                        |
| 关注短信及微信的患教信息                                                        | 318 (100%)            | 318 (100%)               |
| 警惕新型冠状病毒感染的相关症状‡                                                    | 318 (100%)            | 318 (100%)               |
| 关注新型冠状病毒的相关社会新闻                                                     | 318 (100%)            | 318 (100%)               |
| *患者外出时尽量减少在外滞留时间。†用肥皂洗手并用含酒精的消毒液消毒，特别在餐前、如厕后及回家后即刻进行手部卫生。‡发热及呼吸道症状。 |                       |                          |
| 表：患者对微信警报的反应                                                        |                       |                          |

期间IBD患者相关预防的指南撰写。<sup>2</sup>

1月22日，我们向门诊患者发送了关于非典型新型冠状病毒表现的警报（即部分患者仅表现为无发热的胃肠道症状），提醒患者注意隔离与防护。本消化内科团队于武汉封城，实行全民防控后的2020年1月24日，即向公众发布了相关播报，并通过新闻媒体（主要报纸和期刊）转载。

随着我们警报的升级，所有IBD患者均在2天内回应，如外出戴口罩，做好口罩储备，减少外出时间，并对我们的信息和措施均表示非常满意（如表所示）。在疫情期间（1月3日至3月30日），针对重症患者，本中心每周与外科，放射科及其他相关医疗学科会议进行多学科讨论以调整治疗方案。

我们于2月10日向所有患者发放调查问卷，记录其接触史（确诊或疑似新型冠状病毒患者），潜在暴露风险（如工作场所人口稠密及与医护人员接触史），远程就诊和近期出现症状的情况（如发热、呼吸道症状和胃肠道症状）。结果显示，24位（8%）患者有新型冠状病毒的暴露风险，1位患者有新型冠状病毒确诊病例接触史（见附录pp 2、3）。

截至2020年3月30日，本中心注册IBD患者均未出现呼吸道症状及确诊或疑似新型冠状病毒报告病例。其中，29例患者（20例发作及6例活动期患者）通过胸部CT、病毒学检测已排除新型冠状病毒感染。

由于IBD患者易出现频繁及严重的感染，因此IBD团队更需要注重患者的风险评估，防护策略，患者教育，并力争有效治疗。<sup>2</sup>其中，重要的预防和保护策略至关重要，但在现有部分指南中却缺乏相关明确的建议。<sup>3</sup>尽管目前已有新型冠状病毒的相关指南，但在法国、意大利、西班牙和美国，均报告了IBD患者新型冠状病毒感染病例。<sup>4,5</sup>我们的防护与措施超越了现有相关指南的“屏蔽”策略推荐，保障了所管理患者未出现病毒感染的情况。在当前新型冠状病毒全球大流行的高

峰期，面对可能存在的大规模社区传播，对处于免疫抑制的IBD患者实施更严格的保护是非常重要的。

同时，我们与患者的长期和谐关系，对其危险因素的掌握，以及一直以来对患者教育的重视，保证了患者对我们建议的良好依从性。此外，患者与本IBD团队之间的有效沟通方式也发挥了至关重要的作用。本团队的平均处置时间在1天以内。具体讨论与评估见附录（第6-9页）。

值得注意的是，由于中国的高社区传播，且确诊病例之多，鉴于IBD患者的高感染风险和感染后病情严重的可能，中华胃肠病学会建议，特别在疫情严重地区，暂停免疫抑制的相关治疗。<sup>2</sup>但在不同地区的指南和隔离措施也应根据其社区传播的情况而酌情调整。相信我们的经验能为IBD患者在新型冠状病毒感染的预防上提供有意义的参考模式。

申明：Nik Sheng Ding受AbbVie和Janssen资助，其他作者均申明无利益矛盾。致谢：本项目受以下项目资助：国家自然科学基金（董卫国，项目号：81870392；安萍，项目号：81302131；季梦遥，项目号：81901817）。安萍，季梦遥，任海霞，苏娟和Nik Sheng Ding为共同第一作者。

安萍，季梦遥，任海霞，苏娟，Nik Sheng Ding，亢舰，印安宁，周谦，沈林永，赵亮，蒋逍达，肖勇，谭轶，吕晓光，李娇，刘书中，周晶，陈宏斌，徐亚青，刘军，陈明锴，操寄望，周中银，沈磊，谭诗云，于红刚，董卫国，丁一娟\*

Dingyijuan88@163.com

中国，武汉，武汉大学人民医院，消化内科，湖北省消化系统疾病重点实验室，湖北省消化疾病微创治疗临床研究中心（安萍，季梦遥，任海霞，苏娟，亢舰，印安宁，周谦，沈林永，赵亮，蒋逍达，肖勇，谭轶，吕晓光，李娇，刘书中，周晶，刘军，陈明锴，操寄望，周中银，沈磊，谭诗云，于红刚，董卫国，丁一娟）；呼吸与重症医学科（陈宏斌）；感染预防控制办公室（徐亚青）；澳大利亚，墨尔本大学，墨尔本圣文森特医院，消化内科（Nik Sheng Ding）

1 Mao R, Liang J, Shen J, et al. Implications of COVID-19 for patients with pre-existing digestive diseases. *Lancet Gastroenterol Hepatol* 2020; 5: 426-28.

2 Wu KC, Qian JM. Management of patients with inflammatory bowel disease during epidemic

of 2019 novel coronavirus pneumonia. *Chin J Dig* 2020; 40: E001.

3 British Society of Gastroenterology. BSG expanded consensus advice for the management of IBD during the COVID-19 pandemic. April 6, 2020. <https://www.bsg.org.uk/covid-19-advice/bsg-advice-for-management-of-inflammatory-bowel-diseases-during-the-covid-19-pandemic/> (accessed April 6, 2020).

4 Surveillance Epidemiology of Coronavirus Under Research Exclusion-Inflammatory Bowel Disease Database. Current data. April 6, 2020. <https://covidibd.org/current-data/> (accessed April 6, 2020).

5 International Organization for the study of Inflammatory Bowel Disease. IOIBD update on COVID19 for patients with Crohn's disease and ulcerative colitis. April 7, 2020. <https://www.ioibd.org/ioibd-update-on-covid19-for-patients-with-crohn's-disease-and-ulcerative-colitis/> (accessed April 7, 2020).
